# Supplementary material
Source: PubMed Central journal article supplement (PMC4400783)
Supplement: JCM.00051-15_zjm999094261so1.pdf [file JCM.00051-15_zjm999094261so1.pdf]

1 **SUPPLEMENTARY MATERIAL**

2  
3 **Refinement of whole-genome multilocus sequence typing analysis by addressing gene**  
4 **paralogy**

5 Ji Zhang<sup>1#</sup>, Jani Halkilahti<sup>2</sup>, Marja-Liisa Hänninen<sup>1</sup> and Mirko Rossi<sup>1#</sup>

6  
7 <sup>1</sup>Department of Food Hygiene and Environmental Health, University of Helsinki, Helsinki, Finland

8  
9 <sup>2</sup>National Institute for Health and Welfare, Helsinki, Finland

10  
11  
12  
13  
14  
15  
16  
17  
18  
19  
20  
21  
22 <sup>#</sup>Corresponding authors: Mirko Rossi and Ji Zhang

23 [mirko.rossi@helsinki.fi](mailto:mirko.rossi@helsinki.fi)

24 [ji.zhang@helsinki.fi](mailto:ji.zhang@helsinki.fi)

25

## 26 **OVERVIEW OF THE GENOME PROFILER (GEP)**

27 GeP was written in PERL (<http://www.perl.org>) and tested with Perl v5.16.2 in Mac OS X 10.9.5  
28 and Ubuntu Linux 12.04 LTS operating systems. The program is freely available at  
29 (<http://sourceforge.net/projects/genomeprofiler/>) under the terms of the GNU General Public  
30 License. GeP depends on BLAST+ (1) to perform sequence search and MAFFT (2) to align allele  
31 sequences. A flow chart of GeP logic is shown in Figure S1. GeP requires three input files: 1) the  
32 complete or draft genomic sequences of the isolates in FASTA format; 2) a text file listing the  
33 names of the sequence files of the isolates; and 3) an annotated reference genome sequence in  
34 GenBank format. In case of running with the option "-o", the entire 'scheme' folder that created by  
35 GeP in the *ad hoc* mode (see below) is required.

## 36 **AD HOC WHOLE-GENOME MLST RUNNING MODE**

37 GeP initiates the analysis by parsing the GenBank file of the reference genome. For each locus, the  
38 amino acid sequences and their coding sequences are extracted and written separately to  
39 single-FASTA files. The application MAKEBLASTDB in the BLAST+ package is called to format  
40 these sequence files to BLAST databases. From the reference genome, gene information, such as  
41 locus tag, product, gene length and length of all intergenic regions, are recorded and used for the  
42 analysis. The allele number of each locus of the reference genome is set to "1". The analysis  
43 continues by BLAST searching each genome sequence against the reference sequence databases  
44 after turning off the "-dust" (BLASTN) or "-seg" option (BLASTX) to prevent filtration of low  
45 complexity and repetitive regions. If the query genome is in the form of multiple contig sequences,  
46 before performing the BLAST, GeP concatenates the contigs into a single sequence using a spacer  
47 formed by a fixed number of Ns (default 20,000 bp).

48 GeP starts the analysis by calling BLASTN to search the nucleotide sequence reference database  
49 using first the reference, and then one by one the other test genome sequences as query. By default,  
50 all hits that align to less than 50% length of the locus (coverage < 50%) and have nucleotide

51 identity less than 80% are discarded. All the remaining hits are ‘valid hits’. The program will first  
52 search for possible multi-copy gene in the reference genome (self-blasting). If there is more than  
53 one valid hit of the gene were found in the reference, the gene would be marked for the following  
54 analysis. For the test genomes, if there is only one valid hit, it would be deemed as the correct  
55 ortholog in the query genome unless the gene was marked as multi-copy gene in the self-blasting  
56 step (for multi-copy gene, see below). Based on the nucleotide identity within the reference locus  
57 database, an allele number will be attributed to the located ortholog only if the hit covers the entire  
58 length of the reference locus (coverage=100%). Otherwise the locus will be marked as ‘T’  
59 (Truncated) and excluded from the analysis. If the located ortholog is not identical to any of the  
60 sequences in the reference locus database (nucleotide identity < 100%), a new allele number will be  
61 assigned. Then, the new allele sequence will be extracted from the genome and added to the  
62 reference locus nucleotide database. After assigning the allele number, GeP will move to the  
63 following locus.

64 If the above procedure failed to locate the ortholog in the query genome, GeP will call BLASTX to  
65 translate the genome sequence and search corresponding amino acid sequence databases for the  
66 reference locus. If a single BLAST hit covers 50% or more of the full length of one sequence of the  
67 reference locus database and has 80% or more amino acid identity, it will be identified as the  
68 correct ortholog in the query genomic sequence (for multi-copy gene, see below). The nucleotide  
69 sequence of the located ortholog will be extracted from the genome only if it covers the entire  
70 length of the reference locus (coverage=100%). A new allele number will then be assigned and  
71 added to the reference allele nucleotide database. Otherwise, the locus will be marked as ‘T’ and  
72 excluded from the analysis. If BLASTX also failed to locate the ortholog gene in the query genome,  
73 the locus will be marked as ‘M’ (Missing) and excluded from the analysis.

#### 74 **Multi-copy genes**

75 GeP separates orthologs from paralogs by looking for CGN. It assumes that the contiguity and the  
76 distance of any given two neighboring genes should be conserved between the reference genome  
77 and the tested genomes. If multiple copies of a gene were found in the genomes, the pair that  
78 follows the CGN is likely to be orthologs. GeP records the length of all intergenic regions in the  
79 reference genome. Then, to allow wobbling, it defines a value for the ‘expected distance to the  
80 previous locus’ (expected d) by adding 10 extra base pairs to the intergenic region value or, in the  
81 case of gene overlapping, by giving a fixed value of -1. If multiple valid BLASTN or BLASTX hits  
82 (coverage $\geq$ 50% and identity $\geq$ 80% by default) for a given locus are found in the query or  
83 reference genomes, GeP treats the hits as potential orthologs only when they are located inside the  
84 range of ‘expected d’, and the program will automatically select the one with the smallest d value. If  
85 none of the valid BLAST hits were within the range of ‘expected d’, the locus in this genome will  
86 be marked as ‘D’ (Duplicated) and excluded from the analysis.

#### 87 **Extraction of new allele sequences**

88 The new allele sequence is extracted from the study genome sequences based on the coordinates of  
89 the BLAST alignments. If the coordinates are defined by BLASTX, GeP will add three nucleotides  
90 of the downstream to the end of the extracted allele sequence (e.g., to include the stop codon). GeP  
91 also checks if the extracted sequences contain nucleotide ambiguity. If ambiguity is found, the locus  
92 will be marked as ‘N’ (Nucleotide ambiguity), and it will not be counted as a new allele and will be  
93 excluded from the analysis.

#### 94 **Summary of the results**

95 After locating all of the loci in the query genomes and assigning the corresponding allele number,  
96 GeP will summarize the genetic differences of all shared-loci (the loci having allele information in  
97 all of the queries) and write the results to the following files: (i) *output.txt*, (ii)  
98 *difference\_matrix.html*, (iii) *Splitstree.nex*, (iv) *allele\_profile.txt*, and (v) two core genome files  
99 *clonalframe.dat* and *core\_genomes.fas*. The *output.txt* file records the information of all the loci in

100 each of the test genome sequences. All the other output files are derived from *output.txt*. The  
101 HTML output file contains a summary of the analysis and a matrix of pairwise differences between  
102 the allelic profiles of the samples. The numbers in the matrix are hyperlinks, which allow the user to  
103 view a detailed list of the genes with different allelic assignments in the pairwise comparison. By  
104 clicking the name of the gene, the user can visually inspect the sequence alignments and identify all  
105 of the genetic differences in the selected locus. The file *Splitstree.nex* includes the allele profile of  
106 the isolates in NEXUS format, which can be opened in Splitstree 4 (3) and visualized either using  
107 split decomposition or neighbor-net algorithm (4). The *allele\_profile.txt* is a tab-delimited format of  
108 the allele profiles of the isolates, which can be used in downstream population structure analysis  
109 programs, such as STRUCTURE (5) or BAPS (6). Finally the two aligned core genome files  
110 *clonalframe.dat* (eXtended Multi-Fasta format) and *core\_genomes.fas* (Fasta format) can be used as  
111 input for whole-genome evolution and recombination analysis programs.

#### 112 **FIXED SCHEME MLST RUNNING MODE**

113 After the first run in *ad hoc* mode, the wgMLST scheme built in the analysis will be saved to files  
114 in the ‘scheme’ folder in the working directory. New isolates can be analyzed against the wgMLST  
115 scheme by using the option “-o”, and the new allele information will be added to the existing  
116 scheme. This option allows the users to expand the allele database of a peculiar set of isolates and to  
117 develop a specific nomenclature, which can be used for follow-up epidemiological studies. Also it  
118 makes easy to share and transfer the wgMLST scheme between labs, upon which a standardized  
119 wgMLST scheme can be built.

#### 120 **BENCHMARK DATA SETS**

121 To test our program and demonstrate its capabilities, a collection of 19 *Campylobacter jejuni* ST-45  
122 isolates was used in this study. Ten of the isolates originated from three independent waterborne  
123 outbreaks that occurred in 2000 and 2001 in Finland (7). One of the isolates was obtained from a  
124 tap water sample, and the others were isolated from patients (Table S1). According to Finnish

125 legislation, no ethical approval is needed for public health response to a waterborne outbreak. The  
126 other nine non-outbreak-associated isolates were obtained from four Finnish chicken farms. They  
127 were either isolated at a slaughterhouse in summer 2012 (farm A, B, and C) or fecal and  
128 environmental samples of a farm in 2003 (farm D). The collection thus included both  
129 epidemiologically associated and non-associated isolates (Table 1), and they all had similar KpnI  
130 patterns (7,8) (and unpublished data).

131 In addition to the seven previously sequenced isolates (4031, IHV116260, IHV116292, 6237, 6236,  
132 6538 and 6497) (EMBL project number PRJEB4165) (8), the other 12 isolates were sequenced by  
133 Illumina sequencing technology with 100 cycles paired-end reads and Nextera XT library  
134 preparation. Sequencing was performed at the Institute for Molecular Medicine Finland. All the  
135 genomic sequences were assembled using SPAdes genome assembler version 3.1.1 (9).

136 The wgMLST analyses of the 19 *C. jejuni* WGS data were performed with GeP, BIGSdb Genome  
137 Comparator (10) and SeqSphere+ version 1.0 (Ridom GmbH, Münster, Germany) (11) using the  
138 annotated genome sequence of *C. jejuni* 4031 (GenBank Acc. NC\_022529) (8) as reference. The  
139 default settings were used in all three programs. The online tool ‘Genome Comparator’ hosted by  
140 the PubMLST website (<http://pubmlst.org/campylobacter/>, accessed 17.10.2014) was used to test  
141 the performance of the BIGSdb Genome Comparator. All assembled data were deposited in the  
142 PubMLST database (10), and the accession numbers are listed in Table S1.

## 143 **RESULTS AND DISCUSSION**

### 144 **Split-decomposition**

145 The topologies of the splitgraph generated by GeP and SeqSphere+ seemed identical (Fig. S2a; Fig.  
146 S2b) and similar to the one produced by BIGSdb GC (Fig. S2c). The results from both GeP and  
147 SeqSphere+ revealed that, except for outbreak 1, the core genomes of *C. jejuni* belonging to same  
148 outbreak or isolated within the same farm were highly similar. In contrast, the isolates between the  
149 outbreaks or farms were separated from each other, indicating that all analysis tools were able to

150 separate epidemiologically associated isolates from non-associated isolates, confirming the results  
151 of our previous studies (8, 12). Overall, the results of BIGSdb GC overlapped the results produced  
152 by the other two programs, with the exception of a visible net-like structure separating the isolates  
153 of farm B (Fig. S2c). After removing the missing allele state in the BIGSdb GC allele profile (see  
154 main text) the topology of the splitgraph resembles exactly the ones produced by GeP and  
155 SeqSphere+.

156 Despite the general similarity in the splitgraphs, the numbers of identical and polymorphic  
157 shared-loci found by the three programs were different, which affected pairwise allelic differences  
158 of the isolates. In fact, the average of the intra-cluster allele differences calculated by GeP, BIGS  
159 GC and SeqSphere+ was 3.3, 11.3 and 1.2, respectively.

#### 160 **Failing to choose the orthologous gene from the paralogous gene (Error type I)**

161 GeP found in 306 cases, 34 loci containing possible paralogous genes in the tested genomes (Table  
162 S2). GeP was able to use CGN to differentiate orthologs from the paralogs in 222 of these cases  
163 (DATASET S3). Among the 34 loci, four (BN867\_00630, BN867\_00640, BN867\_06950 and  
164 BN867\_09650) were able to be used to generate allele profiles, six (BN867\_05110, BN867\_05120,  
165 BN867\_06960, BN867\_09580, BN867\_09590 and BN867\_09640) were excluded solely because of  
166 inconsistent gene synteny and the other 24 loci were excluded because of either missing, truncation  
167 or nucleotide ambiguity. SeqSphere+ excluded 31 out of 34 of these loci from the analysis, failing  
168 in the identification of the duplication in several cases, which resulted in the omission of one locus  
169 (Table 4). For ten of these loci (Table 2 and 4), SeqSphere+ did not report any information,  
170 presumably because they are duplicated in the reference genome and they were excluded from the  
171 original list of reference loci. BIGSdb GC was more prone to error type I by including in the  
172 analysis 15 loci excluded by GeP, 4 of which were omitted by the latter solely due to duplication  
173 (BN867\_05110, BN867\_05120, BN867\_09580 and BN867\_09590). BIGSdb GC mistakenly  
174 identified these four loci as identical (Table 2 and 4). In addition, BIGSdb GC tagged

175 BN867\_14900 as a paralogous locus, but no extra copy of this locus was found among the 19 tested  
176 genome sequences either by GeP or SeqSphere+.

177 **Homopolymeric tracts (Error type VI)**

178 SeqSphere+ wrongly excluded from the analysis all loci containing homopolymeric tracts, which is  
179 commonly observed in *C. jejuni* genomes (12, 13), if the length of the tracts differs from the  
180 reference genome. GeP takes homopolymeric tracts of different length into account by assigning  
181 different allele numbers. The user can later easily inspect the sequence alignment in the GeP output  
182 files and make a decision whether to include these loci. Variations at hypervariable regions might  
183 cause overestimation in the allele differences, but this phenomenon is usually limited to a small  
184 portion of the core genome (approximately 1-2% of shared-loci in *C. jejuni*) and appears to be  
185 relevant only when highly similar genomes are compared (e.g., different isolates of the same  
186 outbreak) (12, 14). For example, we recently showed that variation in the lengths of homopolymeric  
187 tracts are the only differences detected in outbreak-associated *C. jejuni* isolates, but they have been  
188 considered irrelevant in defining relatedness between the isolates (12).

189



190 **TABLES**191 **Table S1** List of 19 *C. jejuni* ST-45 isolates used in this study

| <b>Origin</b>                    | <b>Isolate</b> | <b>Source</b>    | <b>Year</b> | <b>Accession n</b> | <b>Reference</b> |
|----------------------------------|----------------|------------------|-------------|--------------------|------------------|
| <b>Waterborne<br/>Outbreak 1</b> | 4031           | Water            | 2000        | 2692               | 8, 7             |
|                                  | IHV116260      | Human            | 2000        | 2693               | 8, 7             |
|                                  | IHV116292      | Human            | 2000        | 2694               | 8, 7             |
| <b>Waterborne<br/>Outbreak 2</b> | 540            | Human            | 2001        | 2695               | 7                |
|                                  | 543            | Human            | 2001        | 2697               | 7                |
|                                  | 544            | Human            | 2001        | 2698               | 7                |
| <b>Waterborne<br/>Outbreak 3</b> | T-71726        | Human            | 2001        | 2699               | 7                |
|                                  | T-71727        | Human            | 2001        | 2700               | 7                |
|                                  | T-71731        | Human            | 2001        | 2701               | 7                |
|                                  | T-71732        | Human            | 2001        | 2702               | 7                |
| <b>Chicken farm A</b>            | 6237           | Chicken feces    | 2012        | 2684               | 8                |
|                                  | 6236           | Chicken feces    | 2012        | 2685               | 8                |
| <b>Chicken farm B</b>            | 6538           | Chicken feces    | 2012        | 2686               | 8                |
|                                  | 6541           | Chicken feces    | 2012        | 2689               | This study       |
| <b>Chicken farm C</b>            | 6498           | Chicken feces    | 2012        | 2690               | This study       |
|                                  | 6497           | Chicken feces    | 2012        | 2691               | 8                |
| <b>Chicken farm D</b>            | 4028           | Farm environment | 2003        | 2681               | This study       |
|                                  | 4947           | Farm environment | 2003        | 2682               | This study       |
|                                  | 4948           | Farm environment | 2003        | 2683               | This study       |

192

193

194  
195  
196

**Table S2.** Allele state of 34 putative multi-copy loci found by GeP in each isolate assigned by GeP, BIGSdb GC and SeqSphere+. The isolates are in the following order (from right to left): 4031, 4028, 4947, 4948, 6237, 6236, 6538, 6541, 6498, 6497, IHV116260, IHV116292, 540, 543, 544, T-71726, T-71727, T-71731, and T-71732. F=failed; M=missing; T=truncation; D=duplicated; NA=not available.

| Ref. locus tag | GeP                                   | BIGSdb GC                             | SeqSphere+                            | Product                                                 |
|----------------|---------------------------------------|---------------------------------------|---------------------------------------|---------------------------------------------------------|
| BN867_00630    | 1,2,2,2,2,2,2,2,1,2,2,2,2,2,2,2       | 1,2,2,2,2,2,2,2,1,2,2,2,2,2,2,2       | 2,1,1,1,1,1,1,1,1,1,2,1,1,1,1,1,1,1   | Hemerythrin-like iron-binding protein                   |
| BN867_00640    | 1,2,2,2,1,1,1,1,1,1,3,1,4,4,4,1,1,1,1 | 1,2,2,2,1,1,1,1,1,1,2,1,3,3,3,1,1,1,1 | M,2,2,2,M,M,M,M,M,M,M,M,1,1,1,3,3,3,3 | Hemerythrin-like iron-binding protein                   |
| BN867_00650    | 1,M,M,M,T,T,T,T,T,T,1,2,T,T,T,T,T,T   | 1,2,T,T,1,1,1,1,1,1,3,T,T,T,T,T,T     | 1,M,M,M,1,1,1,1,1,1,F,M,M,M,M,M,M,M   | Hemerythrin-like iron-binding protein                   |
| BN867_01360    | 1,T,T,T,D,T,D,D,T,D,1,1,T,T,T,T,T,T   | 1,2,T,T,T,T,T,T,T,1,1,T,T,T,T,T,T     | 1,M,M,M,M,F,M,M,F,M,1,1,M,M,M,M,M,M   | Methyl-accepting chemotaxis signal transduction protein |
| BN867_02370    | 1,M,M,M,D,D,D,T,D,1,2,T,T,M,M,M,M     | 1,2,T,T,T,T,T,T,T,1,3,T,T,T,T,T,T     | 1,M,M,M,F,F,F,F,F,1,2,M,M,M,M,M,M     | Methyl-accepting chemotaxis signal transduction protein |
| BN867_05110    | 1,1,1,1,1,D,1,1,1,1,1,1,1,1,1,1,1,1   | 1,1,1,1,1,1,1,1,1,1,1,1,1,1,1,1,1     | NA                                    | Putative periplasmic protein                            |
| BN867_05120    | 1,1,1,1,1,D,1,1,1,1,1,1,1,1,1,1,1,1   | 1,1,1,1,1,1,1,1,1,1,1,1,1,1,1,1,1     | NA                                    | FIG00469903: hypothetical protein                       |
| BN867_05130    | 1,T,T,T,1,1,D,1,1,1,1,1,1,1,1,1,1,1,1 | 1,2,T,T,1,1,1,1,1,1,1,1,1,1,1,1,1,1   | NA                                    | Filamentous haemagglutinin domain protein               |
| BN867_05140    | 1,1,1,1,1,D,1,1,1,1,M,1,1,1,1,1,1,1,1 | 1,1,1,1,1,1,1,1,1,2,1,1,1,1,1,1,1,1   | NA                                    | hypothetical protein                                    |
| BN867_05150    | 1,2,2,2,1,1,D,1,T,T,1,1,1,1,3,3,3,3   | 1,2,2,2,1,1,1,1,1,1,1,1,1,1,3,3,3,3   | NA                                    | Putative hemolysin activation/secretion protein         |
| BN867_06930    | 1,2,T,T,1,1,1,1,1,1,1,1,1,1,1,1,1,1   | 1,2,2,2,1,1,1,1,1,1,1,1,1,1,1,1,1,1   | 2,1,1,1,2,2,2,2,2,2,2,M,M,M,M,M,M     | DNA adenine methylase                                   |
| BN867_06950    | 1,2,2,2,1,1,1,1,1,1,1,1,1,1,1,1,1,1   | 1,2,2,2,1,1,1,1,1,1,1,1,1,1,1,1,1,1   | 1,2,2,2,1,1,1,1,1,1,1,1,1,1,1,1,1,1   | hypothetical protein                                    |
| BN867_06960    | 1,2,2,2,1,1,1,3,3,1,4,1,D,1,4,4,4,4   | 1,2,2,2,1,1,1,3,3,1,4,1,T,1,4,4,4,4   | 1,M,M,M,1,1,1,1,F,1,2,M,M,M,2,2,2,2   | phage repressor protein, putative                       |
| BN867_06990    | 1,2,2,2,1,1,1,1,1,1,1,1,T,1,1,1,1,1,1 | 1,2,2,2,1,1,1,1,1,1,1,1,T,1,1,1,1,1,1 | 1,2,2,2,1,1,1,1,1,1,1,1,M,1,1,1,1,1,1 | FIG00471770: hypothetical protein                       |
| BN867_07950    | 1,T,T,T,T,D,T,N,N,1,1,1,1,1,1,1,1,1,1 | 1,2,T,T,1,1,1,1,1,1,1,1,1,1,1,1,1,1   | M,M,M,M,M,M,M,M,M,M,M,M,M,M,M,M       | FIG00470444: hypothetical protein                       |
| BN867_08150    | 1,T,T,T,T,T,T,N,N,1,1,1,1,1,1,1,1,1,1 | 1,2,T,T,1,1,1,3,3,1,1,1,1,1,1,1,1,1   | M,M,M,M,M,M,M,M,M,M,M,M,M,M,M,M       | FIG00470444: hypothetical protein                       |
| BN867_09580    | 1,1,1,1,D,1,1,1,1,1,1,1,1,1,1,1,1,1,1 | 1,1,1,1,1,1,1,1,1,1,1,1,1,1,1,1,1,1   | NA                                    | Putative periplasmic protein                            |
| BN867_09590    | 1,1,1,1,D,1,1,1,1,1,1,1,1,1,1,1,1,1,1 | 1,1,1,1,1,1,1,1,1,1,1,1,1,1,1,1,1,1   | NA                                    | FIG00469903: hypothetical protein                       |
| BN867_09600    | 1,T,T,T,D,1,1,1,1,1,1,1,1,1,1,1,1,1,1 | 1,2,T,T,1,1,1,1,1,1,1,1,1,1,1,1,1,1   | NA                                    | Filamentous haemagglutinin domain protein               |
| BN867_09610    | 1,1,1,1,D,1,1,1,1,1,M,1,1,1,1,1,1,1,1 | 1,1,1,1,1,1,1,1,1,1,2,1,1,1,1,1,1,1   | NA                                    | hypothetical protein                                    |
| BN867_09620    | 1,2,2,2,D,1,1,1,T,T,1,1,1,1,3,3,3,3   | 1,2,2,2,1,1,1,1,1,1,1,1,1,1,3,3,3,3   | NA                                    | Putative hemolysin activation/secretion protein         |
| BN867_09630    | 1,M,M,M,D,D,D,D,D,1,2,T,T,T,T,T,T     | 1,2,T,T,3,3,3,3,1,1,1,4,T,T,T,T,T,T   | M,M,M,M,M,M,1,1,M,M,M,M,M,M,M,M,M     | Hemerythrin-like iron-binding protein                   |
| BN867_09640    | 1,D,D,D,D,D,D,D,D,2,1,3,3,3,1,1,1,1   | 1,2,2,2,1,1,1,1,1,2,1,3,3,3,1,1,1,1   | M,2,2,2,M,M,M,M,M,M,M,M,1,1,1,3,3,3,3 | Hemerythrin-like iron-binding protein                   |
| BN867_09650    | 1,1,1,1,1,1,1,1,1,1,1,1,1,1,1,1,1,1   | 1,1,1,1,1,1,1,1,1,1,1,1,1,1,1,1,1,1   | 1,1,1,1,1,1,1,1,1,1,1,1,1,1,1,1,1,1   | Hemerythrin-like iron-binding protein                   |
| BN867_13090    | 1,M,M,M,T,T,T,T,T,1,1,1,1,1,1,1,1,1,1 | 1,M,M,M,T,T,T,T,T,1,1,1,1,1,1,1,1,1,1 | 1,M,M,M,M,M,M,M,M,1,1,1,1,1,1,1,1     | FIG00471635: hypothetical protein                       |
| BN867_13100    | 1,M,M,M,T,T,T,T,T,1,1,1,1,1,1,1,1,1,1 | 1,M,M,M,T,T,T,T,T,1,1,1,1,1,1,1,1,1,1 | 1,M,M,M,M,1,M,M,M,1,1,1,1,1,1,1,1     | FIG00471635: hypothetical protein                       |
| BN867_13180    | 1,T,T,T,M,T,T,T,M,1,2,2,M,2,M,M,T,M   | 1,2,M,M,M,T,T,T,M,1,3,3,M,3,M,M,T,M   | 2,M,M,M,M,M,M,M,M,2,1,1,M,1,M,M,M     | Motility accessory factor                               |
| BN867_13200    | 1,M,M,M,M,M,M,T,T,M,2,3,3,M,3,M,M,T,M | 1,2,T,T,M,M,M,T,T,M,3,4,T,M,T,M,M,T,M | 1,M,M,M,M,M,M,M,M,2,3,M,M,M,M,M,M     | Motility accessory factor                               |
| BN867_13220    | 1,T,T,T,T,T,T,T,2,3,1,M,1,4,5,T,4     | 1,T,T,T,T,T,T,T,2,3,1,M,1,4,5,T,4     | M,M,M,M,M,M,M,M,M,M,M,M,M,M,M,M       | Flagellin                                               |
| BN867_13230    | 1,T,T,T,T,T,T,T,2,T,3,M,3,1,4,T,1     | 1,T,T,T,T,T,T,T,2,3,3,M,3,1,2,M,1     | M,M,M,M,M,M,M,M,M,M,M,M,M,M,M,M       | Flagellin                                               |
| BN867_13240    | 1,M,T,T,T,T,D,T,2,1,3,1,D,1,T,1,D,T   | 1,M,T,T,T,T,T,2,1,3,1,T,1,T,1,T,T     | 1,M,M,M,M,M,M,M,3,1,4,1,M,1,M,1,M,M   | Motility accessory factor                               |
| BN867_13250    | 1,M,T,T,T,M,D,1,M,1,M,1,D,1,T,1,D,T   | 1,M,T,T,T,M,T,1,2,1,3,1,T,1,T,1,T,T   | 1,M,M,M,M,M,M,1,M,1,M,1,M,1,M,1,M,M   | Motility accessory factor                               |
| BN867_14900    | 1,M,M,M,1,1,1,1,1,1,1,1,1,1,M,M,M,M   | 1,2,2,2,1,1,1,1,1,1,1,1,1,3,3,3,3     | 1,M,M,M,1,1,1,1,1,1,1,1,1,M,M,M,M     | hypothetical protein                                    |
| BN867_15290    | 1,M,M,M,T,M,T,M,T,1,2,T,M,T,T,T,T     | 1,M,M,M,T,T,T,T,T,1,2,T,M,T,T,T,T     | 1,M,M,M,M,M,F,M,M,1,2,M,M,M,M,M,M     | Methyl-accepting chemotaxis signal transduction protein |

# FIGURES

## Figure S1

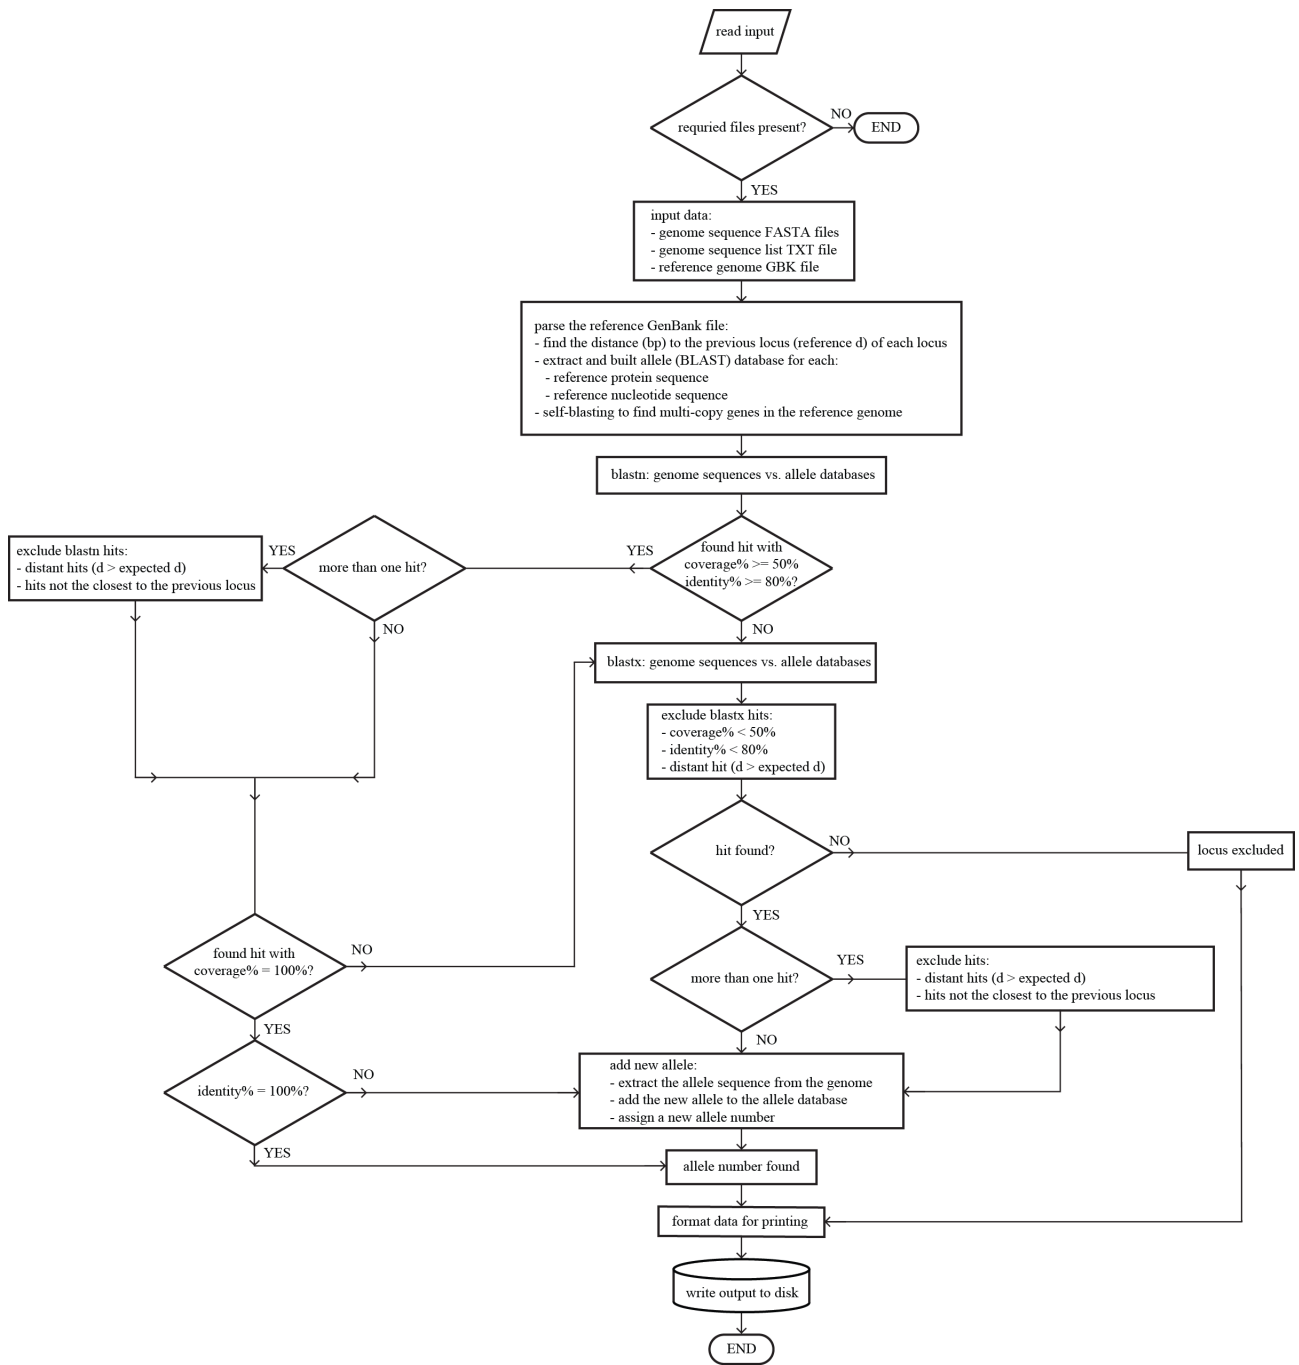

Figure S2

**a**

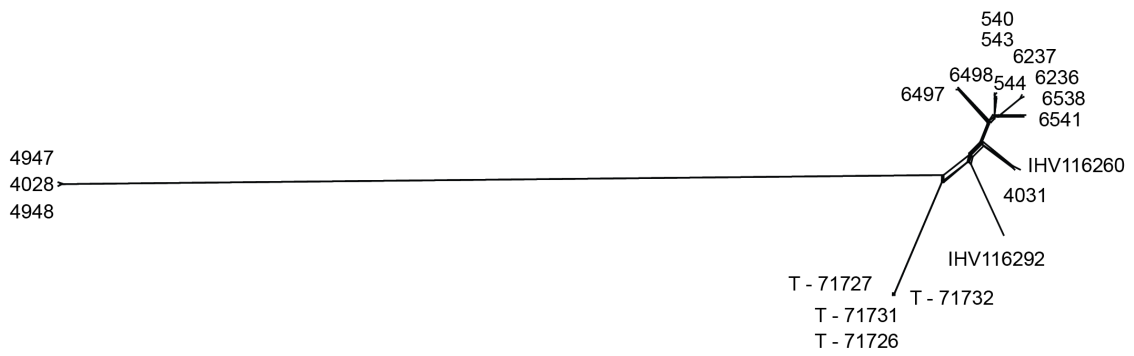

**b**

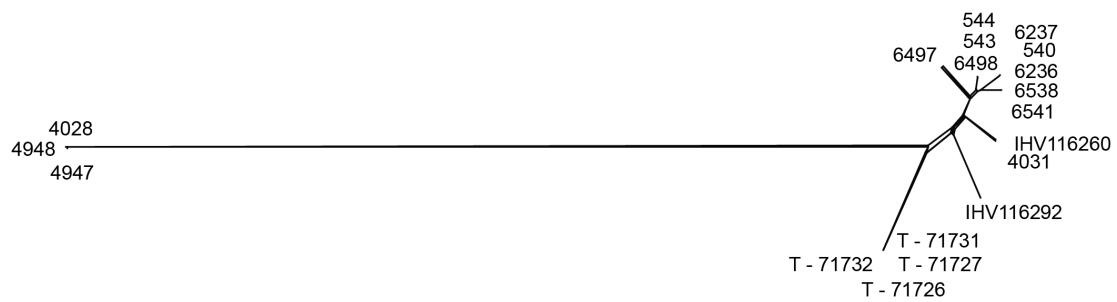

**c**

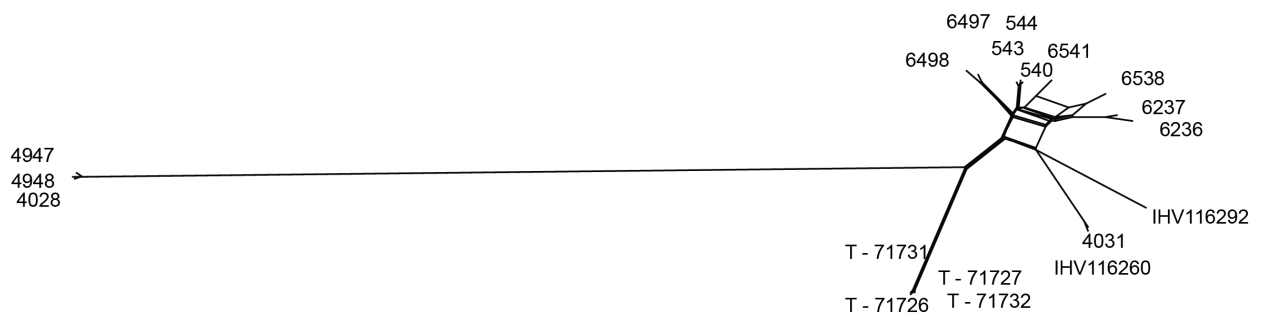

**d**

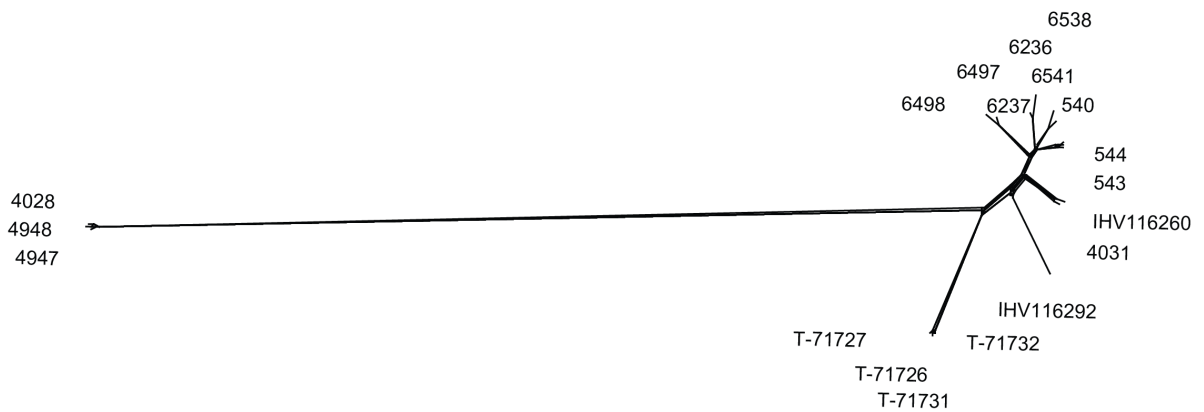

0.1

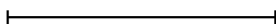

## FIGURE CAPTURES

**Figure S1.** Flow chart of GeP logic. Standard symbols for constructing flow charts were used.

**Figure S2.** Split decomposition of the allelic profile of the 19 *C. jejuni* genomes generated by GeP (panel a), SeqSphere+ (panel b) and BIGSdb GC (panel c). The last graph (panel d) is also generated by BIGSdb GC, but with all the Error type II eliminated from the result.

## REFERENCES

1. **Camacho C, Coulouris G, Avagyan V, Ma N, Papadopoulos J, Bealer K, Madden TL.** 2009. BLAST+: architecture and applications. *BMC bioinformatics* **10**:421.
2. **Katoh K, Standley DM.** 2013. MAFFT multiple sequence alignment software version 7: improvements in performance and usability. *Mol Biol Evol* **30**:772-780.
3. **Huson DH, Bryant D.** 2006. Application of phylogenetic networks in evolutionary studies. *Mol Biol Evol* **23**:254-267.
4. **Huson DH.** 1998. SplitsTree: analyzing and visualizing evolutionary data. *Bioinformatics* **14**:68-73.
5. **Pritchard JK, Stephens M, Donnelly P.** 2000. Inference of population structure using multilocus genotype data. *Genetics* **155**:945-959.
6. **Corander J, Waldmann P, Marttinen P, Sillanpää MJ.** 2004. BAPS 2: enhanced possibilities for the analysis of genetic population structure. *Bioinformatics* **20**:2363-2369.
7. **Hänninen ML, Haajanen H, Puumi T, Wermundsen K, Katila ML, Sarkkinen H, Miettinen I, Rautelin H.** 2003. Detection and typing of *Campylobacter jejuni* and *Campylobacter coli* and analysis of indicator organisms in three waterborne outbreaks in Finland. *Appl Environ Microbiol* **69**:1391-1396.
8. **Revez J, Llarena AK, Schott T, Kuusi M, Hakkinen M, Kivisto R, Hänninen ML, Rossi M.** 2014. Genome analysis of *Campylobacter jejuni* strains isolated from a waterborne outbreak. *BMC genomics* **15**:768.
9. **Bankevich A, Nurk S, Antipov D, Gurevich AA, Dvorkin M, Kulikov AS, Lesin VM, Nikolenko SI, Pham S, Prjibelski AD, Pyshkin AV, Sirotkin AV, Vyahhi N, Tesler G, Alekseyev MA, Pevzner PA.** 2012. SPAdes: a new genome assembly algorithm and its applications to single-cell sequencing. *J Comput Biol* **19**:455-477.
10. **Jolley KA, Maiden MC.** 2010. BIGSdb: Scalable analysis of bacterial genome variation at the population level. *BMC bioinformatics* **11**:595.
11. **Kohl TA, Diel R, Harmsen D, Rothganger J, Walter KM, Merker M, Weniger T, Niemann S.** 2014. Whole-genome-based *Mycobacterium tuberculosis* surveillance: a standardized, portable, and expandable approach. *J Clin Microbiol* **52**:2479-2486.
12. **Revez J, Zhang J, Schott T, Kivisto R, Rossi M, Hänninen ML.** 2014. Genomic variation between *Campylobacter jejuni* isolates associated with milk-borne-disease outbreaks. *J. Clin. Microbiol.* **52**:2782-2786.
13. **Jerome JP, Bell JA, Plovianich-Jones AE, Barrick JE, Brown CT, Mansfield LS.** 2011. Standing genetic variation in contingency loci drives the rapid adaptation of *Campylobacter jejuni* to a novel host. *PloS one* **6**:e16399.
14. **Revez J, Schott T, Llarena AK, Rossi M, Hänninen ML.** 2013. Genetic heterogeneity of *Campylobacter jejuni* NCTC 11168 upon human infection. *Infect Genet Evol* **16**:305-309.
